# Supplementary material for: Mild and efficient palladium(ii)-catalyzed racemization of allenes
Source: Royal Society of Chemistry journal article supplement (doi:10.1039/b316482a), 2004-01-01
Supplement: b316482a.doc [file b316482a.doc]

Mild and Efficient Palladium(II)-Catalyzed Racemization of Allenes

Attila Horváth and Jan-E. Bäckvall*

*Department of Organic Chemistry, Arrhenius Laboratory, Stockholm University, SE-106 91 Stockholm, Sweden. Fax: +46- 9-674 7178; Tel: +46-8-154908; E-mail: jeb@organ.su.se*

# Supplementary Information

The allenes were synthesised according to the Scheme below.

(a) 1.Et3N, 4Å mol. sieves; 2.THF/MeOH/2M NaOH 1/1/1; 3.cinchonidine; 4. 2M H2SO4. (b) dimethoxypropane, PTSA. (c) 1.*n*-BuLi; 2.octanal or paraformaldehyde; 3.LiAlH4. (d) Ac2O, pyridine. (e) 1.(COOH)2, 2.NaOH. (f) (Boc)2O, Et3N or TsCl, pyridine, DMAP. (g) PhMgBr, CuBr, LiBr. (h) CH3C(OEt)3, propionic acid.

All starting materials are commercially available compounds or their protected analogues except the optically active propargylic alcohol needed for the preparation of amine **5b**. This was prepared according to the scheme bellow and the same authors will publish its detailed synthesis elsewhere.

(a) 2,2-dimethoxy-propane, *p*-TSA, 97%; (b) LiAlH4, 62%; (c) BnCl, NaH; (d) CCl4, P(Ph)3; (e) LDA, 59% overall for c,d,e; (f) MsCl, NEt3, 91%.

**General Methods.** Diethyl ether and THF were distilled from sodium benzophenone ketyl; acetonitrile was distilled from CaH2 and Et3N was dried over 4Å mol. sieves. All other reagents and solvents were used without further purification.

1H NMR (400 or 300 MHz) and 13C NMR (100 or 75 MHz) were recorded on a Varian Mercury spectrometer using the residual peek of chloroform‑*d* (7.26 ppm for 1H and 77 ppm for 13C) as internal standard. IR spectra were recorded on a Perkin-Elmer 1600 FT-IR instrument using neat films of the samples and only the strongest or structurally most important peeks are listed. Optical rotations were measured on a Perkin-Elmer 241 polarimeter. Preparative HPLC was performed on a Bischoff liquid chromatograph using Kromasil 100 SIL 5m (25020 mm) column. Analytical HPLC was performed on a Waters liquid chromatograph using  Porasil (3003.9) column. Merck silica 60 (240‑400 mesh) was used for column chromatography and analytical TLC was performed on Merck precoated silica 60‑F254 plates.

***(S)*-2-Methyl-4-phenyl-2,3-butadienoic acid (1)**. The racemic ethyl ester of acid **1** was prepared according to a literature procedure in 72% isolated yield.1 Hydrolysis in a 1/1/1 mixture of THF/MeOH/2M NaOH(aq) (0.33M) afforded the racemic acid that was resolved with chinchonidine to give the optically active acid **1**: 13C NMR (75 MHz, CDCl3)  213.6, 172.5, 131.8, 128.8 (2C), 127.9, 127.4 (2C), 99.0, 97.6, 14.7; []= +185.4º, []= +880.7º (c=0.41, ethyl-acetate). The 1H NMR and IR spectra were reported earlier.2

***(S)*-Methyl 2-methyl-4-phenyl-2,3-butadienoate (2)**. Acid **1** was methylated in analogy to a published procedure.3 []= +183.0º, []= +192.5º (c=0.97, CH3CN). The 1H NMR, 13C NMR and IR spectra were reported earlier.4

**9,10-Hexadecadien-8-ol (3a)**. The synthesis and full characterization of **3a** has been published before.5

***(S)*-2,3-Pentadien-1-ol (3b)**. Alcohol **3b** was prepared according to literature procedures.6;7 Compounds **3b** and **3c** were obtained in low isolated yields due to reduction of the alkyne to alkene by LiAlH4 instead of the SN2’ reaction. The 1H NMR, 13C NMR and IR spectra were reported earlier.

***(S)*-4-Phenyl-2,3-butadien-1-ol (3c)**. Alcohol **3c** was prepared according to literature procedures.6;7 []= +105.9º, []= +111.0º (c=0.49, CH3CN). The 1H NMR, 13C NMR and IR spectra were reported earlier.8

**1-Heptyl-2,3-nonadienyl acetate(4a)**. The synthesis and full characterization of **4a** has been published before.5 The diastereomers were separated by preparative HPLC (pentane/diethyl ether 95/5).

***(S)*-2,3-Pentadienyl acetate (4b)**. The title compound was prepared in analogy of the procedure published earlier.5 13C NMR (100 MHz, CDCl3) 206.2, 170.8, 87.6, 86.3, 62.8, 21.0, 13.9; []= -76.3º (c=0.81, CH3CN). The 1H NMR and IR spectra were reported earlier.

***(R)*-2,3-Pentadienylamine (5a)**. Intermediate **5a** was prepared according to a literature procedure9 in 54 % isolated yield. The title compound was stored and used for further reactions as the oxalate salt.9

***(R)*-5-(Benzyloxy)-2,3-pentadienylamine (5b).** Intermediate **5b** was prepared in analogy to a literature procedure9 from the appropriate mesylated propargylic alcohol in 30 % isolated yield: 1H NMR (CDCl3, 300 MHz)  7.39-7.27 (m, 5H), 5.39 (m, 2H), 4.55 (s, 2H), 4.07 (dd, *J*= 5.9, 3.0 Hz, 2H), 3.33 (dd, *J* = 5.1, 3.7 Hz, 2H), 1.19 (br s, 2H); 13C NMR (CDCl3, 75 MHz)  203.9, 138.1, 128.4 (2C), 127.8 (2C), 127.7, 94.9, 91.0, 71.9, 68.2, 40.6.

***(R)-tert*-Butyl *N*-(2,3-pentadienyl)carbamate (6a).** To the oxalate salt of **5a** (1.029g, 4.11 mmol, the mol.weight of the salt was determined by NMR in D2O using benzoquinone as internal standard) in 7.4 ml methanol was added triethylamine (1.39 ml, 10 mmol) and di-*tert*-butyl dicarbonate (0.898 g, 4.11 mmol). The mixture was stirred for 1.5 h, then the solvent was evaporated and the residue cleaned by column chromatography (pentane/diethyl ether 2/1) to afford the title compound in 68 % isolated yield (0.512 g): []= -32.3º, []= -34.5º (c=0.95, CH3CN); IR (neat, cm-1) 3348, 1969, 1701, 1712; 1H NMR (CDCl3, 400 MHz)  5.19 (app.tq, *J*= 3.1, 7.1 Hz, 1H), 5.10 (m, 1H), 4.67 (br.s, 1H), 3.65 (m, 2H), 1.64 (dd, *J*= 3.2, 7.1 Hz, 3H), 1.42 (s, 9H).

***(R)-tert*-Butyl *N*-[5-(benzyloxy)-2,3-pentadienyl]carbamate (6b).** Synthesized from **5b** in 81 % yield according to the procedure described for the synthesis of **6a**. []= -56.7º, []= -59.8º (c=1.04, CH3CN); IR (neat, cm-1) 3344, 1967, 1700 (br), 1169; 1H NMR (CDCl3, 400 MHz, at 60ºC)  7.34 (d, *J*= 4.4 Hz, 4H), 7.28 (m, 1H), 5.41 (app.tq, *J*= 3.0, 6.5 Hz, 1H), 5.30 (app.tq, *J*= 2.4, 5.9 Hz, 1H), 4.59 (br.s, 1H), 4.54 (s, 2H), 4.07 (dd, *J*= 2.4, 6.5 Hz, 2H), 3.73 (dt, *J*= 3.0, 5.9 Hz, 2H), 1.45 (s, 9H); 13C NMR (CDCl3, 75 MHz)  204.4, 155.7, 138.3, 128.4 (2C), 127.8 (2C), 127.6, 91.5, 90.5, 79.5, 72.0, 68.0, 39.4, 28.4 (3H).

***(R)-N*1-(2,3-Pentadienyl)-*p*-toluenesulfonamide (6c)** The mixture of the oxalate salt of **5a** (1.52 g, 6.08 mmol, the mol.weight of the salt was determined by NMR in D2O using benzoquinone as internal standard) and 2M NaOH was extracted by CH2Cl2 ,the organic phase was dried over Na2SO4 and the solvent was evaporated to afford **5a**. TsCl (1.16 g, 6.08 mmol), pyridine (0.49 ml, 6.08 mmol) and DMAP (74 mg, 0.61 mmol) was added to the amine **5a** in 12 ml CH2Cl2 at –20 oC and then the mixture was stirred overnight. After washing the reaction mixture with water the solvent was evaporated and the residue cleaned by flash chromatography (pentane/ether 1/1) to afford **6c** (0.662 g, 46 %): []= -57.0º, []= -60.0º (c=1.04, CH3CN); IR (neat, cm-1) 3283, 1971, 1160; 1H NMR (CDCl3, 300 MHz)  7.75 (app.dt, *J*= 8.4, 2.0 Hz, 2H), 7.29 (m, 2H), 5.15 (app.q quintet, *J* = 7.1, 3.1 Hz, 1H), 4.98 (m, 1H), 4.70 (br t, *J*= 6.1 Hz, 1H), 3.53 (dt, *J*= 3.1, 5.9 Hz, 2H), 2.41 (s, 3H), 1.58 (dd, *J*= 7.1, 3.1 Hz, 3H); 13C NMR (CDCl3, 75 MHz)  204.2, 143.4, 137.0, 129.6 (2C), 127.1 (2C), 89.2, 87.1, 41.8, 21.4, 14.0.

***(S)*-1-Phenyl-1,2-octadiene (7).** The synthesis and full characterization of **7** has been published before.10 []= +303.7º (c=0.97, CH3CN).

***(R)*-Ethyl 2,3-nonadienoate (8).** The title compound was prepared in analogy of the procedure published earlier11 in 71 % yield. []= +62.8º, []= +59.7º (c=1.03, CH3CN); IR (neat, cm-1) 1966, 1739, 1158.

# **Reference List**

1. Marshall, J. A., Wolf, M. A., Wallace, E. M., *Journal of Organic Chemistry*, 1997**, 62**, 367.

2. Runge, W., Kresze, G., *Liebigs Ann.Chem.*, 19751361.

3. Revial, G., Jabin, I., Lim, S., Pfau, M., *Journal of Organic Chemistry*, 2002**, 67**, 2252.

4. Trifonov, L. S., Orahovats, A. S., Heimgartner, H., *Helv.Chim.Acta*, 1990**, 73**, 1734.

5. Horváth, A., Bäckvall, J.-E., *Journal of Organic Chemistry*, 2001**, 66**, 8120.

6. Cowie, J. S., Landor, P. D., Landor, S. R., *Journal of the Chemical Society, Perkin Trans 1.*, 1973**, 7**, 720.

7. Duke, R. K., Rickards, R. W., *Journal of Organic Chemistry*, 1984**, 49**, 1898.

8. Vinson, N. A., Day, C. S., Welker, M. E., *Organometallics*, 2000**, 19**, 4356.

9. For preparation of **5a** and characterization of its oxalate salt see:Claesson, A., Sahlberg, C., *Tetrahedron*, 1982**, 38**, 363.

10. Elsevier, C. J., Vermeer, P., *Journal of Organic Chemistry*, 1989**, 54**, 3726.

11. Mori, K., Nukada, T., Ebata, T., *Tetrahedron*, 1981**, 37**, 1343.
